# Supplementary material for: Distinguishing pure histopathological growth patterns of colorectal liver metastases on CT using deep learning and radiomics: a pilot study
Source: PubMed Central journal article supplement (PMC8510954; doi:10.1007/s10585-021-10119-6), 2021-09-17

a.

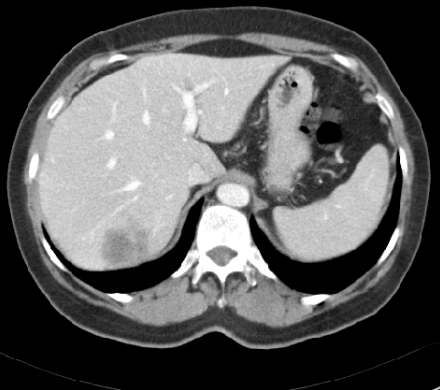

b.

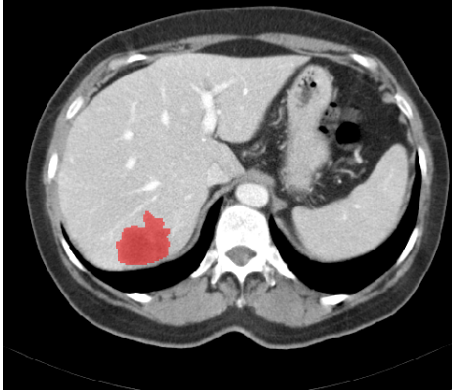

c.

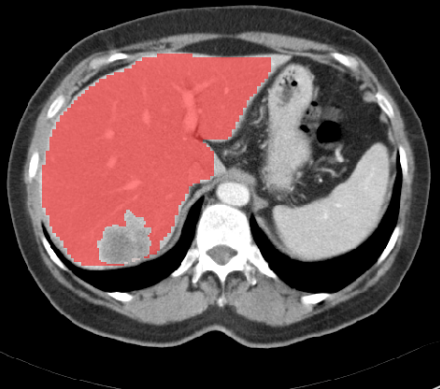

d.

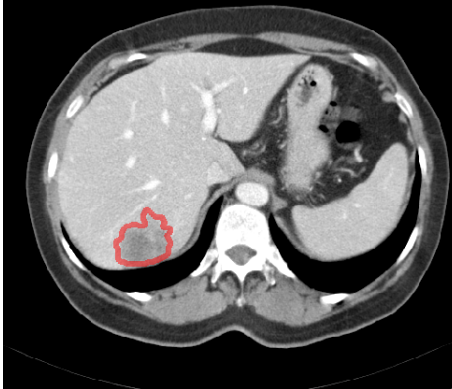

Supplement: 10585_2021_10119_MOESM6_ESM.pdf [file 10585_2021_10119_MOESM6_ESM.pdf]
